# Supplementary material for: Correlation between Microstructure and Magnetism in Ball-Milled SmCo5/α-Fe (5%wt. α-Fe) Nanocomposite Magnets
Source: MDPI journal article supplement (doi:10.3390/ma14040805), 2021-02-08
Supplement: s1 [file s1]

Supplementary materials

# Correlation Between Microstructure and Magnetism in Ball-Milled $\text{SmCo}_5/\alpha\text{-Fe}$ (5%wt. $\alpha\text{-Fe}$ ) Nanocomposite Magnets

Anna Bajorek <sup>1,2\*</sup>, Paweł Łopadczak <sup>1,2</sup>, Krystian Prusik <sup>2,3</sup> and Maciej Zubko <sup>2,3</sup>

<sup>1</sup> A. Chełkowski Institute of Physics, University of Silesia in Katowice, 75 Pułku Piechoty 1, 41-500 Chorzów, Poland; p.lopaczak@gmail.com

<sup>2</sup> Silesian Center for Education and Interdisciplinary Research, University of Silesia in Katowice, 75 Pułku Piechoty 1A, 41-500 Chorzów, Poland; krystian.prusik@us.edu.pl (K.P.); maciej.zubko@us.edu.pl (M.Z.)

<sup>3</sup> Institute of Materials Science, University of Silesia in Katowice, 75 Pułku Piechoty 1A, 41-500 Chorzów, Poland

\* Correspondence: anna.bajorek@us.edu.pl; Tel.: +48-32-349-7582

**Table S1.** Phase content and refinements factors determined from Rietveld refinement of XRD pattern for  $\text{SmCo}_5/\alpha\text{-Fe}$  (5%wt. of  $\alpha\text{-Fe}$  content) nanocomposite.

| Milling Time t (h) | $\text{Sm}(\text{Co/Fe})_5$<br>1: 5 | $\alpha\text{-Fe}$ | $\text{Sm}_2(\text{Co/Fe})_{17}$<br>2: 17 | $R_{\text{wp}}$ | $R_{\text{B}}$ | $R_{\text{exp}}$ |
|--------------------|-------------------------------------|--------------------|-------------------------------------------|-----------------|----------------|------------------|
| 0.5                | 48.63                               | 39.22              | 12.15                                     | 0.45616         | 0.34788        | 0.36525          |
| 1                  | 55.33                               | 32.01              | 12.66                                     | 0.45899         | 0.35581        | 0.37983          |
| 1.5                | 57.26                               | 31.34              | 11.4                                      | 0.39556         | 0.31173        | 0.35519          |
| 2                  | 60.45                               | 28.2               | 11.35                                     | 0.36904         | 0.29046        | 0.3246           |
| 4                  | 62.45                               | 27.59              | 9.95                                      | 0.48229         | 0.30603        | 0.28105          |
| 6                  | 62.46                               | 26.29              | 11.25                                     | 0.45609         | 0.32526        | 0.33305          |
| 8                  | 64.15                               | 26.1               | 9.75                                      | 0.51087         | 0.33494        | 0.28133          |
| 10                 | 66.91                               | 26.28              | 6.28                                      | 0.32705         | 0.249          | 0.27554          |

**Table S2.** Crystallites size and lattice strain determined from Rietveld refinement of XRD pattern for  $\text{SmCo}_5/\alpha\text{-Fe}$  (5%wt. of  $\alpha\text{-Fe}$  content) nanocomposite.

| Milling Time t (h) | $\text{Sm}(\text{Co/Fe})_5$<br>1: 5 |                                                    | $\alpha\text{-Fe}$         |                                                    | $\text{Sm}_2(\text{Co/Fe})_{17}$<br>2: 17 |                                      |
|--------------------|-------------------------------------|----------------------------------------------------|----------------------------|----------------------------------------------------|-------------------------------------------|--------------------------------------|
|                    | $d_{\text{cryst}}$<br>[nm]          | $\epsilon_{\text{RMS}}$                            | $d_{\text{cryst}}$<br>[nm] | $\epsilon_{\text{RMS}}$                            | $d_{\text{cryst}}$<br>[nm]                | $\epsilon_{\text{RMS}}$              |
| 0                  | 526.6<br>$\pm 3.508$                | $4.45 \times 10^{-4}$<br>$\pm 1.69 \times 10^{-5}$ | 596.469<br>$\pm 15.55$     | $3.11 \times 10^{-4}$<br>$\pm 6.7 \times 10^{-6}$  | —                                         | —                                    |
| 0.5                | 39.429<br>$\pm 0.407$               | $2.19 \times 10^{-4}$<br>$\pm 1.89 \times 10^{-5}$ | 76.406<br>$\pm 5.337$      | $8.03 \times 10^{-4}$<br>$\pm 1.75 \times 10^{-4}$ | 96.269<br>$\pm 3.766$                     | 0.00157<br>$\pm 5.62 \times 10^{-5}$ |
| 1                  | 22.885<br>$\pm 0.253$               | $3.32 \times 10^{-4}$<br>$\pm 4.31 \times 10^{-5}$ | 80.693<br>$\pm 1.171$      | 0.00166<br>$\pm 2.05 \times 10^{-4}$               | 28.593<br>$\pm 0.252$                     | 0.00237<br>$\pm 2.26 \times 10^{-4}$ |
| 1.5                | 45.514<br>$\pm 3.732$               | $4.02 \times 10^{-4}$<br>$\pm 1.56 \times 10^{-4}$ | 99.389<br>$\pm 18.086$     | 0.0018<br>$\pm 1.67 \times 10^{-4}$                | 26.387<br>$\pm 1.299$                     | 0.00407<br>$\pm 1.79 \times 10^{-4}$ |
| 2                  | 24.997<br>$\pm 0.775$               | 0.0051<br>$\pm 1.19 \times 10^{-4}$                | 81.761<br>$\pm 7.387$      | 0.00176<br>$\pm 1.17 \times 10^{-4}$               | 10.804<br>$\pm 0.115$                     | 0.00584<br>$\pm 7.77 \times 10^{-4}$ |
| 4                  | 13.444<br>$\pm 0.462$               | 0.00571<br>$\pm 3.14 \times 10^{-4}$               | 89.773<br>$\pm 31.009$     | 0.00251<br>$\pm 3.39 \times 10^{-4}$               | 15.202<br>$\pm 0.702$                     | 0.00375<br>$\pm 4.04 \times 10^{-4}$ |
| 6                  | 11.45<br>$\pm 0.397$                | 0.00465<br>$\pm 1.57 \times 10^{-4}$               | 23.436<br>$\pm 2.431$      | $1.02 \times 10^{-4}$<br>$\pm 7.9 \times 10^{-5}$  | 11.512<br>$\pm 0.297$                     | 0.0027<br>$\pm 3.02 \times 10^{-4}$  |
| 8                  | 16.935<br>$\pm 0.74$                | 0.00838<br>$\pm 4.67 \times 10^{-4}$               | 10.661<br>$\pm 0.924$      | 0.00223<br>$\pm 5.42 \times 10^{-4}$               | 23.392<br>$\pm 2.194$                     | 0.00482<br>$\pm 4.06 \times 10^{-4}$ |

|    |                      |                                      |                       |                                      |                       |                                      |
|----|----------------------|--------------------------------------|-----------------------|--------------------------------------|-----------------------|--------------------------------------|
| 10 | 6.529<br>$\pm 0.125$ | 0.00885<br>$\pm 5,45 \times 10^{-4}$ | 47.188<br>$\pm 0.126$ | 0.00554<br>$\pm 2.98 \times 10^{-4}$ | 20.264<br>$\pm 0.726$ | 0.00464<br>$\pm 2.07 \times 10^{-4}$ |
|----|----------------------|--------------------------------------|-----------------------|--------------------------------------|-----------------------|--------------------------------------|

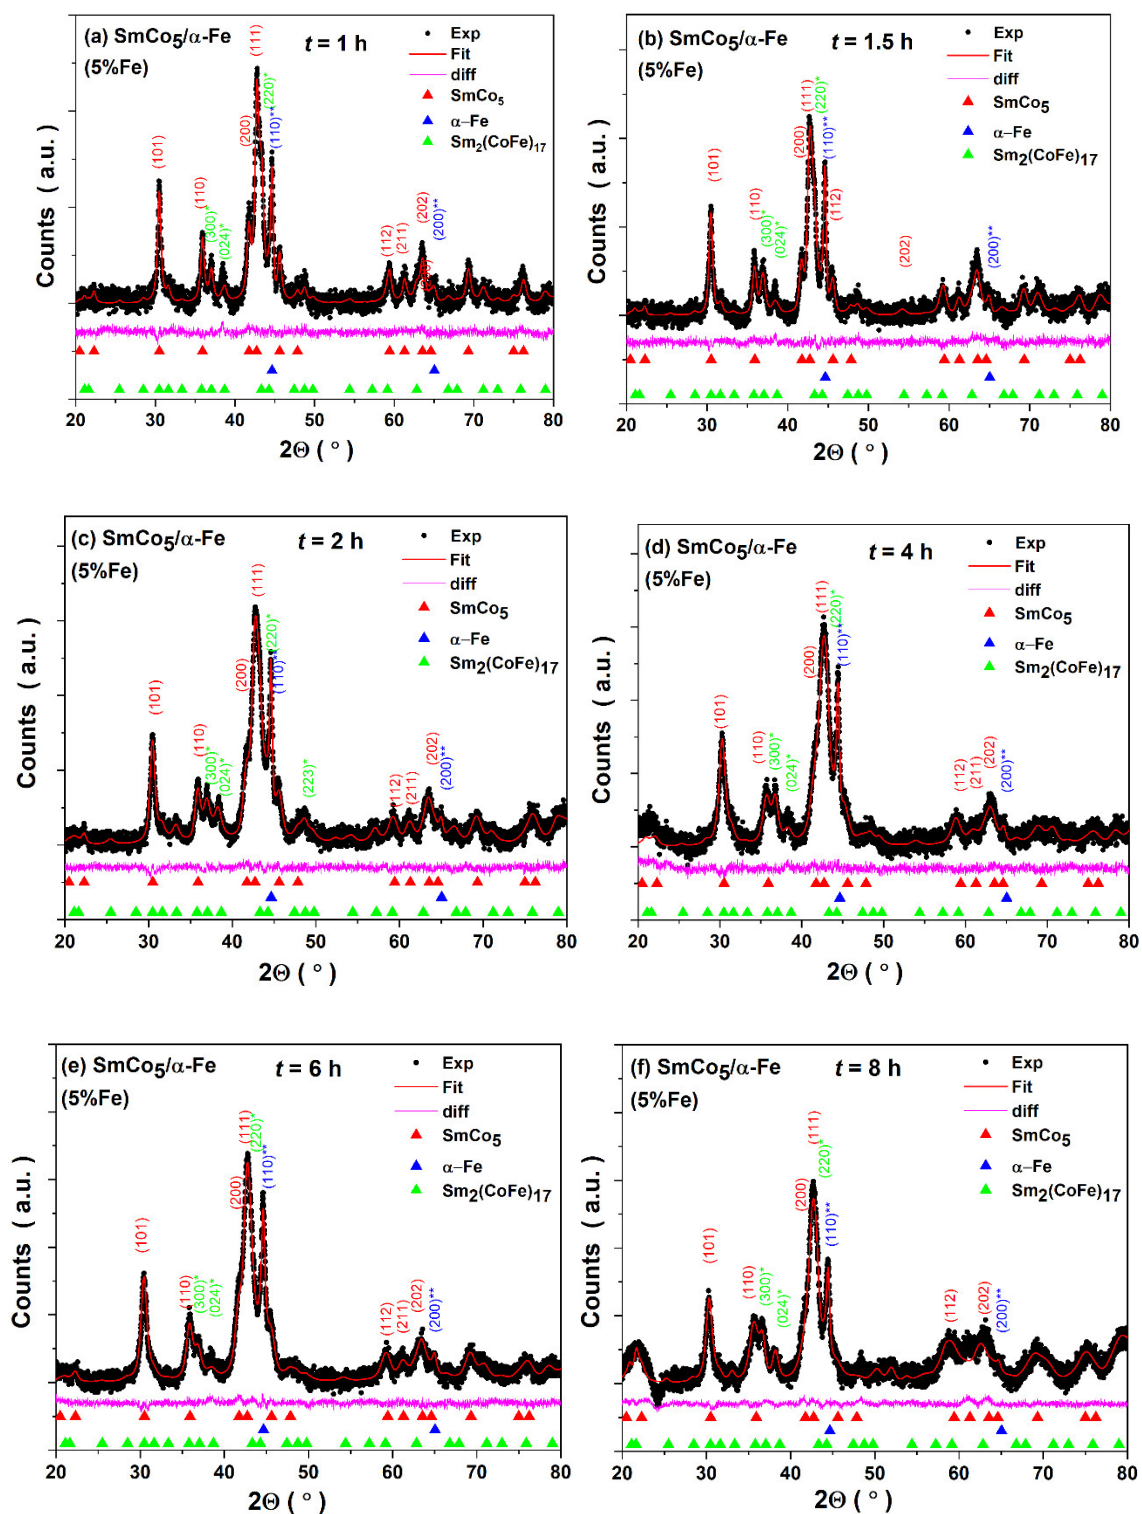

Figure S1. Rietveld refinement of XRD pattern for  $\text{SmCo}_5/\alpha\text{-Fe}$  (5%wt. of  $\alpha\text{-Fe}$  content) for powders milled for (a)  $t = 1$  h; (b)  $t = 1.5$  h; (c)  $t = 2$  h; (d)  $t = 4$  h; (e)  $t = 6$  h; (f)  $t = 8$  h.



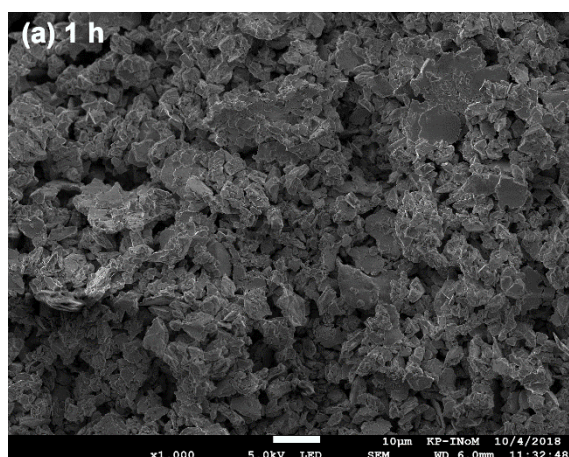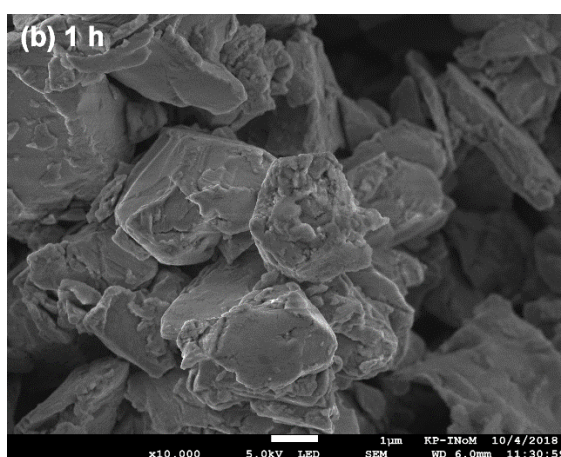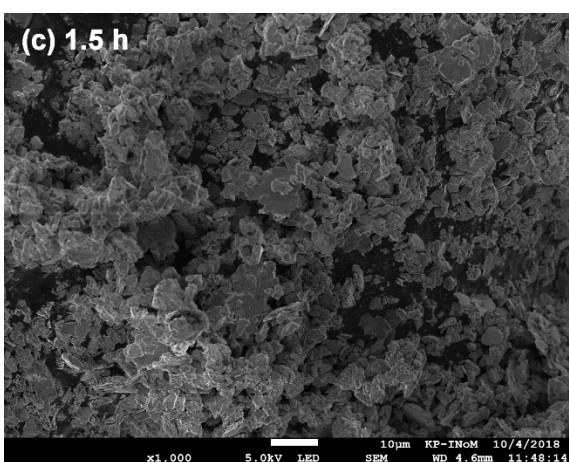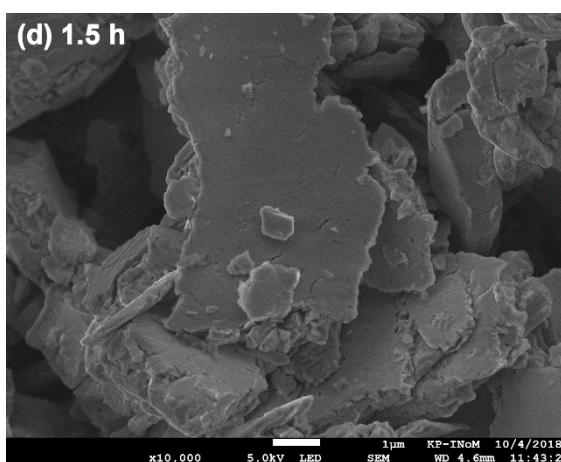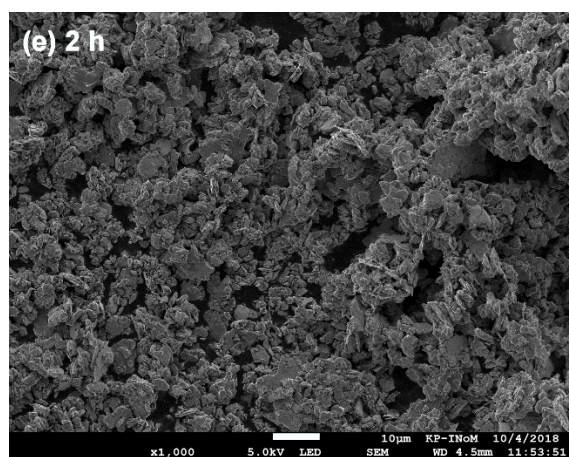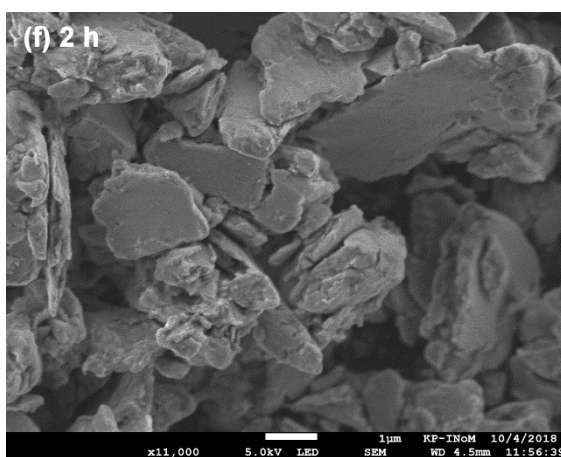



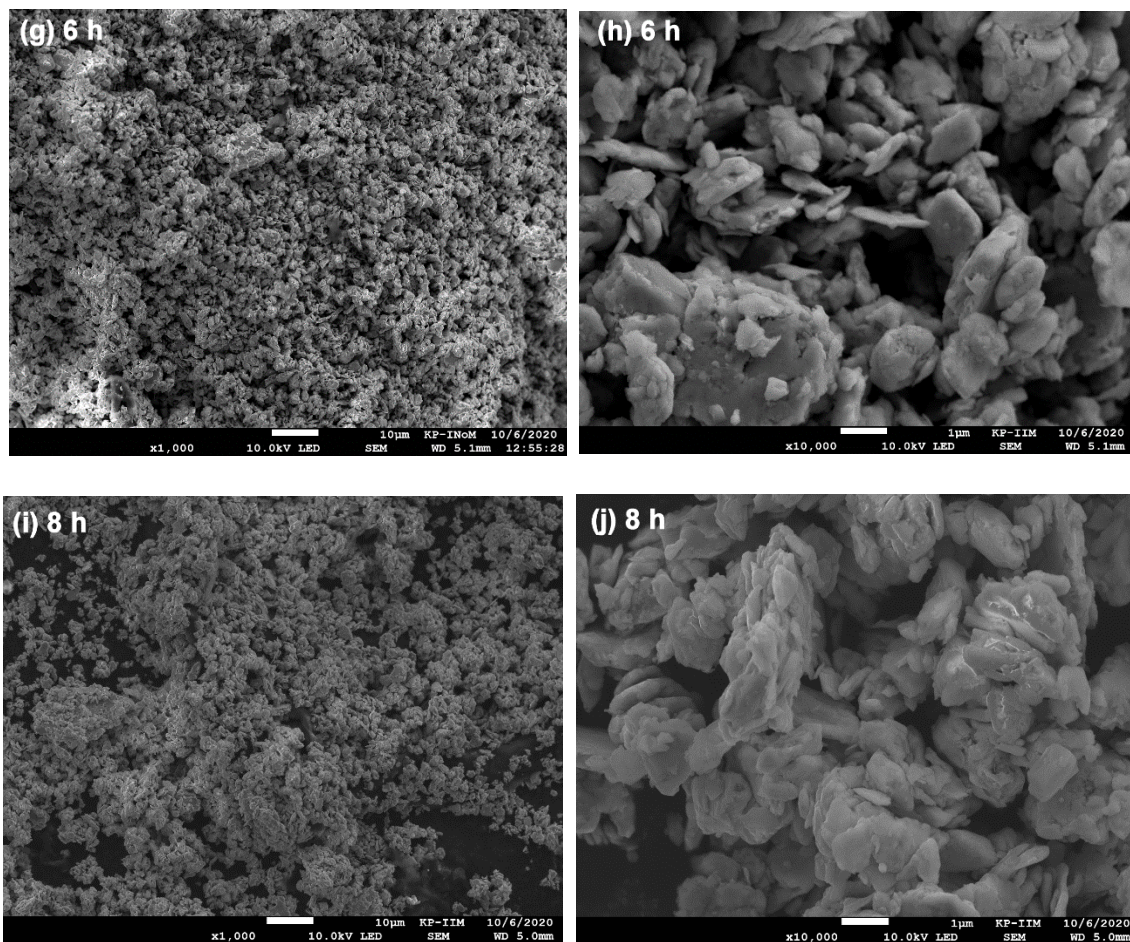

**Figure S2.** The microstructure of  $\text{SmCo}_5/\alpha\text{-Fe}$  (5%wt. of  $\alpha\text{-Fe}$  content) milled for: 1 h (a) and (b); 1.5 h (c) and (d); 2 h (e) and (f); 6 h (g) and (h); 8 h (i) and (j).

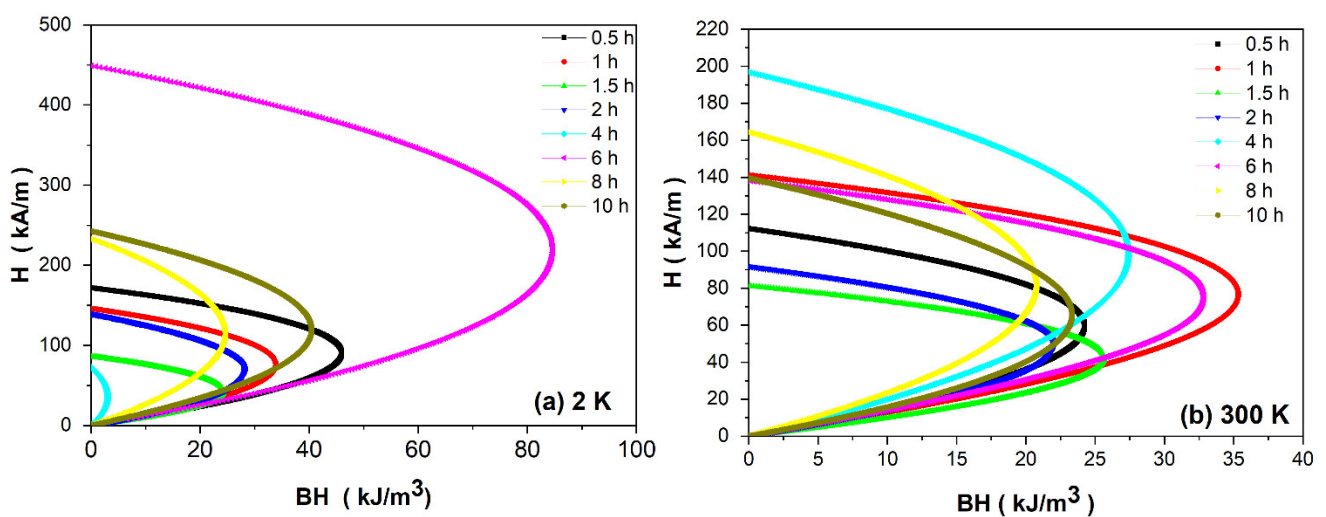

**Figure S3.** The relation of  $H$  versus  $BH$  with visible  $(BH)_{\text{max}}$  estimated based on demagnetizing curves measured at (a) 2K and (b) 300 K for the  $\text{SmCo}_5/\alpha\text{-Fe}$  (5%wt. of  $\alpha\text{-Fe}$  content) samples.

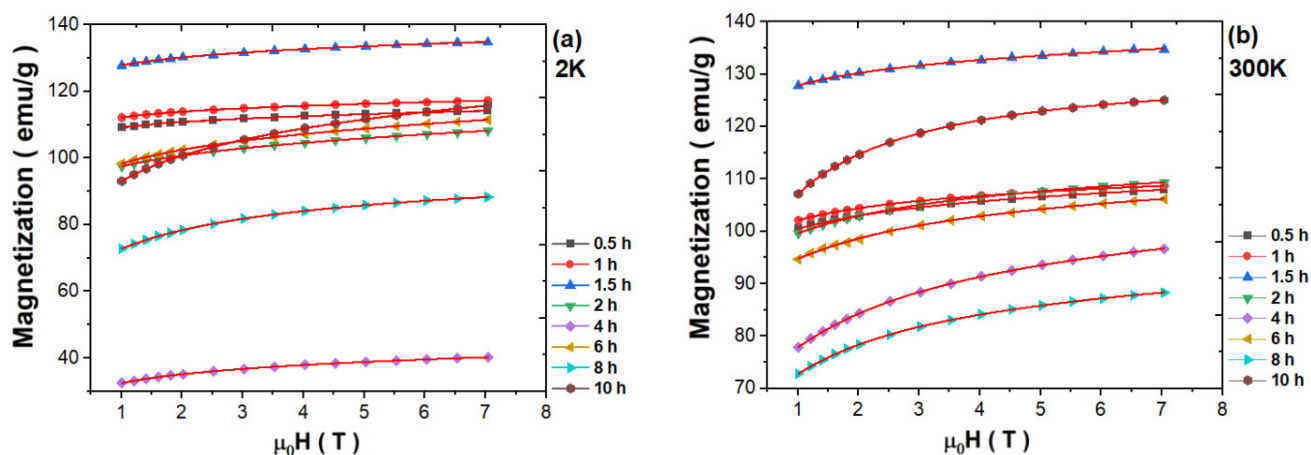

**Figure S4.** The fitting of magnetization curves measured at (a) 2K and (b) 300 K for the SmCo<sub>5</sub>/α-Fe (5%wt. of α-Fe content) samples.

**Table S3.** Magnetic parameters determined from hysteresis loops fitting for SmCo<sub>5</sub>/α-Fe.  
(5%wt. of α-Fe content) nanocomposite

| t (h) | M <sub>s</sub><br>(emu/g) |                   | a [ $\sqrt{kOe}$ ] |                   | $\chi_p$<br>(emu/g Oe) $\times 10^{-3}$ |                   | K <sub>1</sub><br>(erg/cm <sup>3</sup> ) $\times 10^5$ |                  |
|-------|---------------------------|-------------------|--------------------|-------------------|-----------------------------------------|-------------------|--------------------------------------------------------|------------------|
|       | 2K                        | 300K              | 2K                 | 300K              | 2K                                      | 300K              | 2K                                                     | 300K             |
| 0.5   | 114.79 $\pm$ 0.59         | 112.69 $\pm$ 0.69 | 0.065 $\pm$ 0.011  | 0.168 $\pm$ 0.012 | 0.285 $\pm$ 0.033                       | 0.212 $\pm$ 0.039 | 2.75 $\pm$ 0.69                                        | 5.62 $\pm$ 0.38  |
| 1     | 117.81 $\pm$ 0.46         | 112.98 $\pm$ 0.46 | 0.066 $\pm$ 0.008  | 0.143 $\pm$ 0.008 | 0.277 $\pm$ 0.063                       | 0.160 $\pm$ 0.026 | 2.31 $\pm$ 0.59                                        | 5.05 $\pm$ 0.29  |
| 1.5   | 137.69 $\pm$ 0.69         | 137.35 $\pm$ 1.41 | 0.069 $\pm$ 0.012  | 0.099 $\pm$ 0.021 | 0.304 $\pm$ 0.079                       | 0.304 $\pm$ 0.079 | 4.74 $\pm$ 0.98                                        | 4.76 $\pm$ 1.10  |
| 2     | 110.58 $\pm$ 0.61         | 116.61 $\pm$ 0.48 | 0.184 $\pm$ 0.008  | 0.226 $\pm$ 0.008 | 0.608 $\pm$ 0.022                       | 0.198 $\pm$ 0.027 | 5.59 $\pm$ 0.21                                        | 6.67 $\pm$ 0.23  |
| 4     | 43.95 $\pm$ 0.20          | 114.24 $\pm$ 0.77 | 0.383 $\pm$ 0.008  | 0.510 $\pm$ 0.077 | 0.276 $\pm$ 0.011                       | 0.196 $\pm$ 0.043 | 3.11 $\pm$ 0.08                                        | 10.34 $\pm$ 0.26 |
| 6     | 115.84 $\pm$ 0.39         | 115.93 $\pm$ 1.84 | 0.232 $\pm$ 0.006  | 0.291 $\pm$ 0.029 | 0.650 $\pm$ 0.222                       | 0.173 $\pm$ 0.041 | 6.63 $\pm$ 0.20                                        | 7.87 $\pm$ 0.79  |
| 8     | 101.53 $\pm$ 0.61         | 102.68 $\pm$ 0.61 | 0.445 $\pm$ 0.010  | 0.453 $\pm$ 0.091 | 0.606 $\pm$ 0.034                       | 0.106 $\pm$ 0.034 | 8.35 $\pm$ 0.23                                        | 8.35 $\pm$ 0.22  |
| 10    | 128.53 $\pm$ 0.76         | 145.58 $\pm$ 0.55 | 0.418 $\pm$ 0.010  | 0.370 $\pm$ 0.007 | 0.714 $\pm$ 0.043                       | 0.349 $\pm$ 0.104 | 9.78 $\pm$ 0.08                                        | 9.84 $\pm$ 0.23  |
